# Supplementary material
Source: publisher figshare collection journal article supplement (https://frontiersin.figshare.com/ndownloader/files/21612510)
Supplement: Supplementary file [file 21612510]

**Supplemental Table 4.** Validation of prediction metrics for *NUP155* R672G mutation.

| Predictive metrics | Score  |
|--------------------|--------|
| SIFT               | 0*     |
| PolyPhen           | 1*     |
| REVEL              | 0.953* |
| MetaLR             | 0.952* |
| Mutation Assessor  | 0.876* |

Note: Comparison of different predictive metrics for R672G mutation (*NUP155* rsID: rs373376199; *Homo sapiens* Transversion G→C) by ENSEMBL including SIFT and Polyphen, two of the metrics used in this study. ENSEMBL predictive metrics included REVEL, MetaLR, and Mutation Assessor. \*Scored as pathogenic for respective metric.
